# Supplementary material for: A scalable and tunable platform for functional interrogation of peptide hormones in fish
Source: eLife journal article supplement (doi:10.7554/elife.85960), 2023-09-18

# Figure 1- Source Data

A. Live images of male and female WT and *gh1<sup>Δ4/Δ4</sup>*

♂

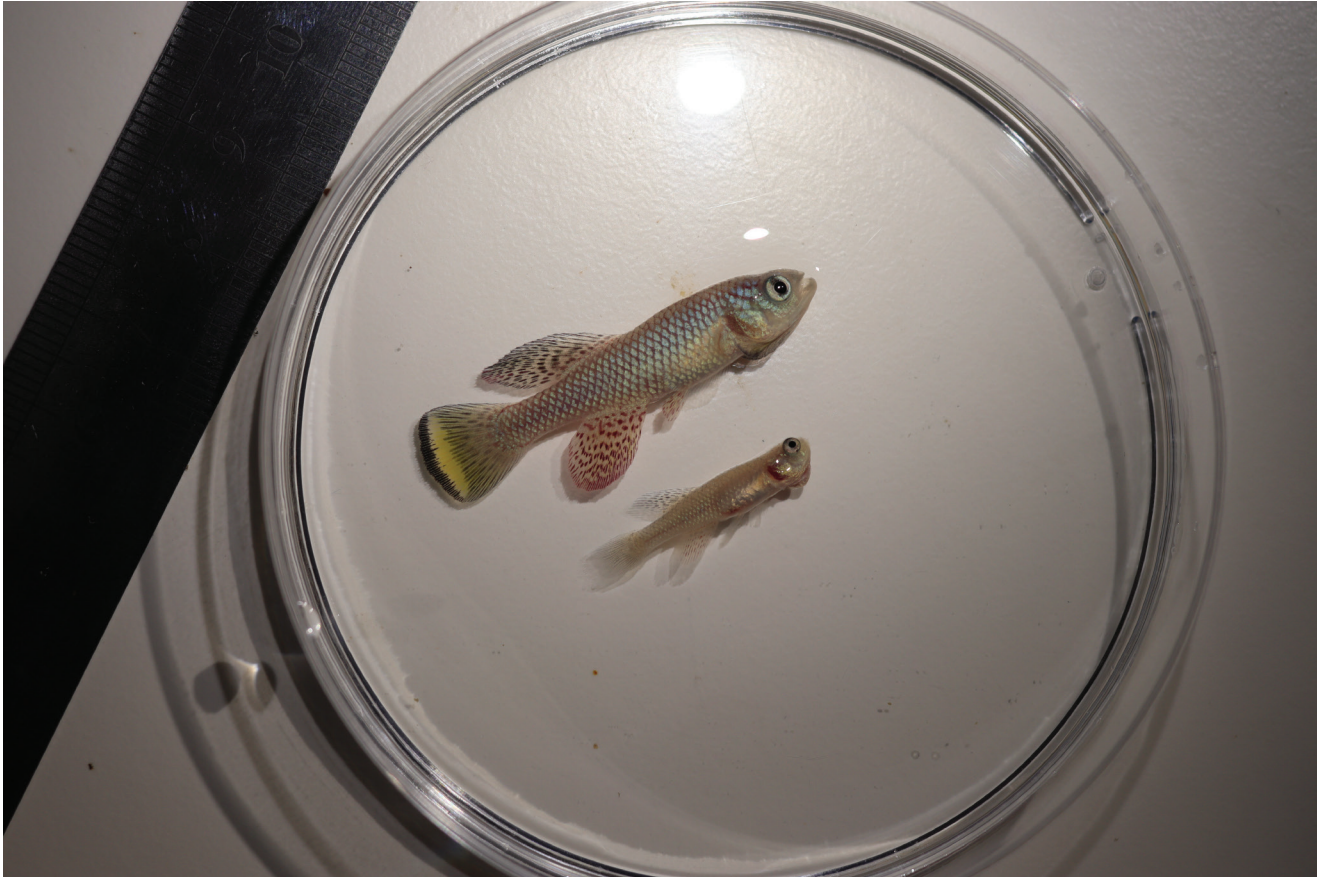

♀

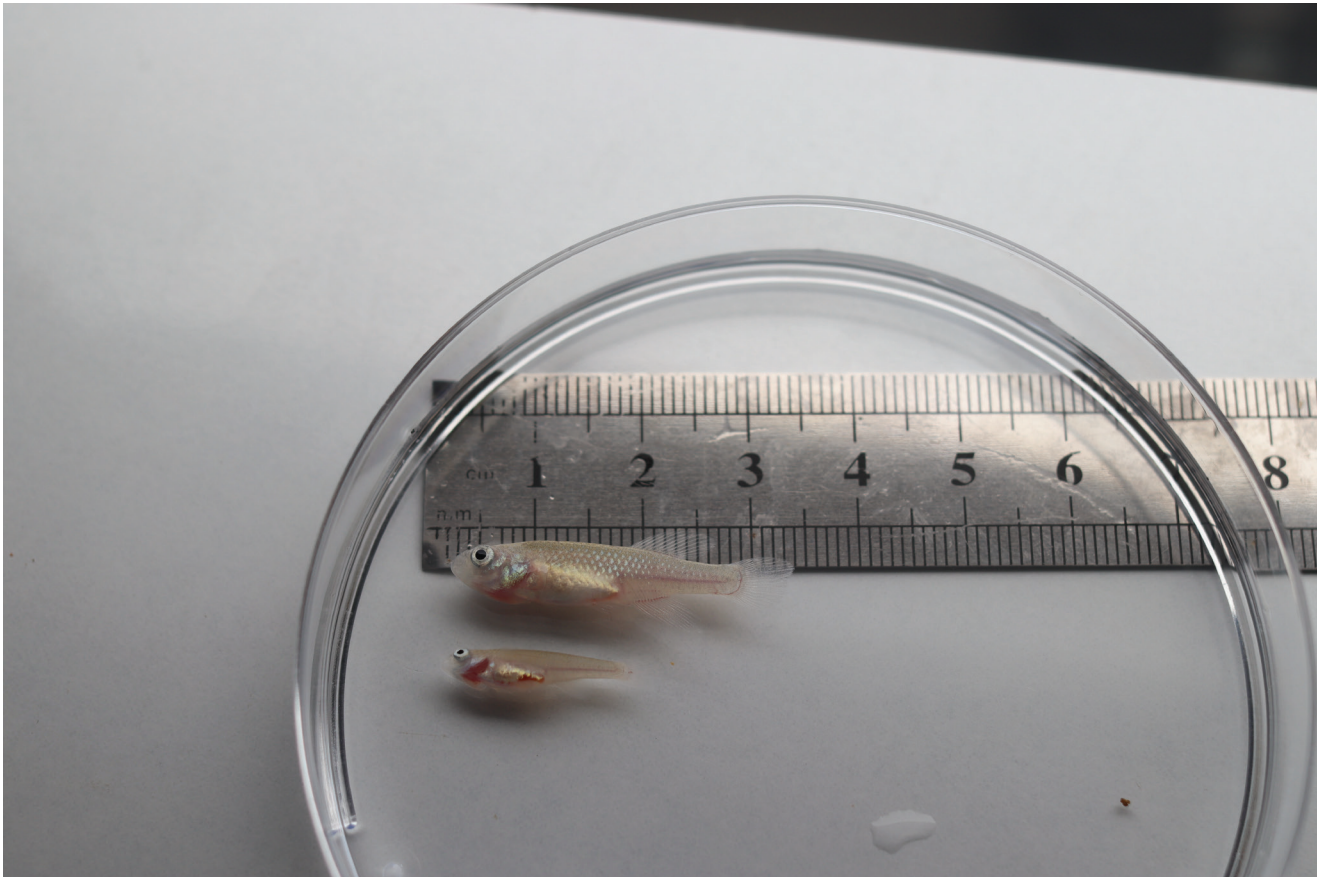

Supplement: fig1-data1 [file elife-85960-fig1-data1-v1.pdf]
