# Supplementary material for: A scalable and tunable platform for functional interrogation of peptide hormones in fish
Source: eLife journal article supplement (doi:10.7554/elife.85960), 2023-09-18

**Figure 2 - Source Data 1**

**A. H&E image of WT male and female gonads**

♂

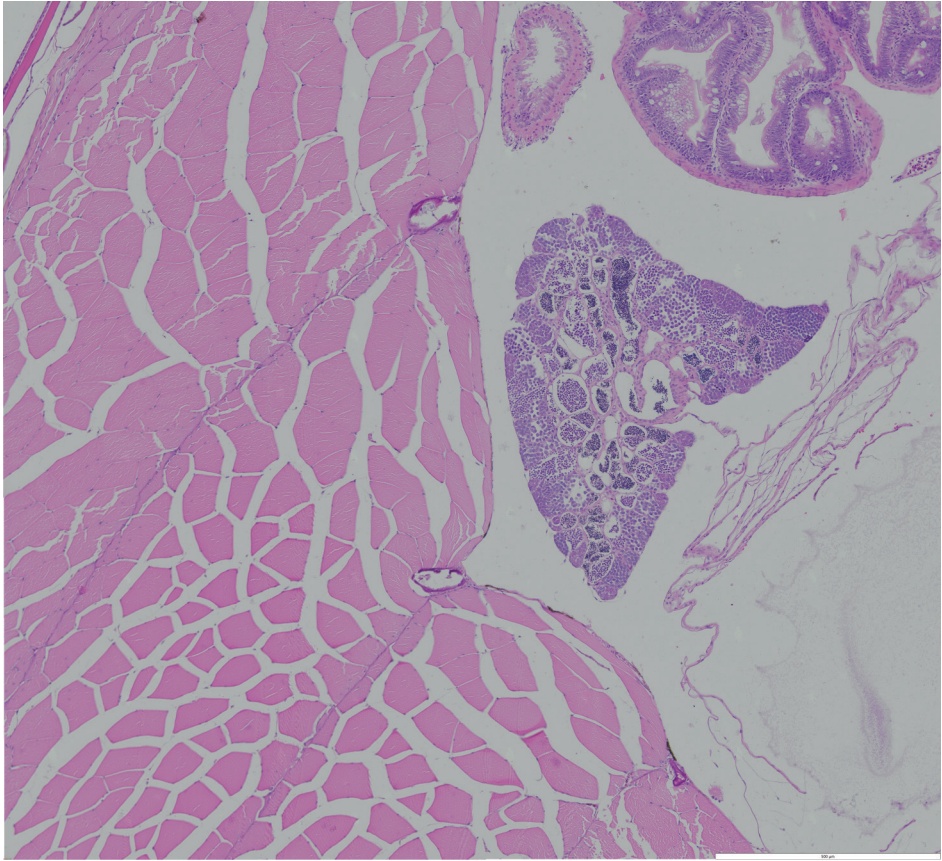

♀

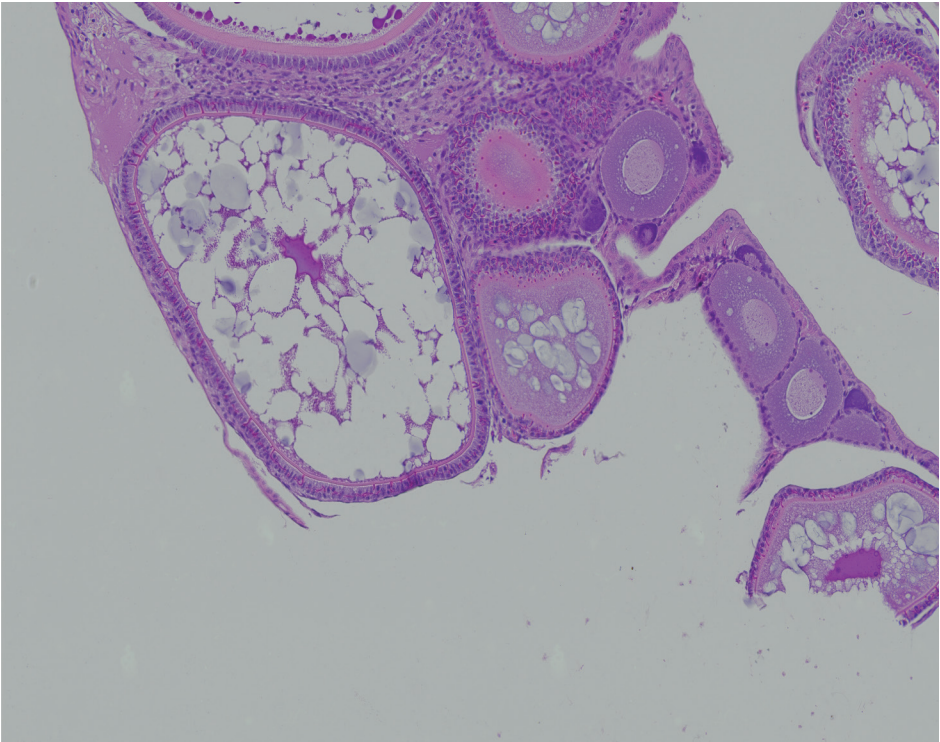

Supplement: fig2-data1 [file elife-85960-fig2-data1-v1.pdf]
