# Supplementary material for: A scalable and tunable platform for functional interrogation of peptide hormones in fish
Source: eLife journal article supplement (doi:10.7554/elife.85960), 2023-09-18

## Figure 2 - Source Data 2

A. H&E image of *gh1<sup>Δ4/Δ4</sup>* male and female body cavity

♂

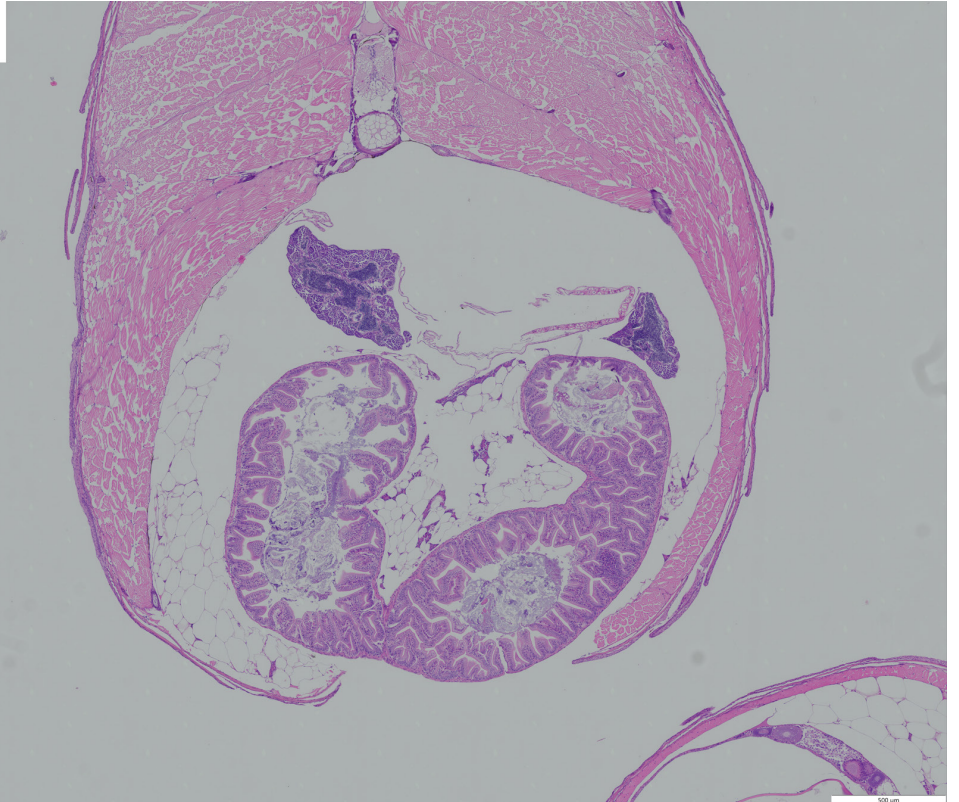

♀

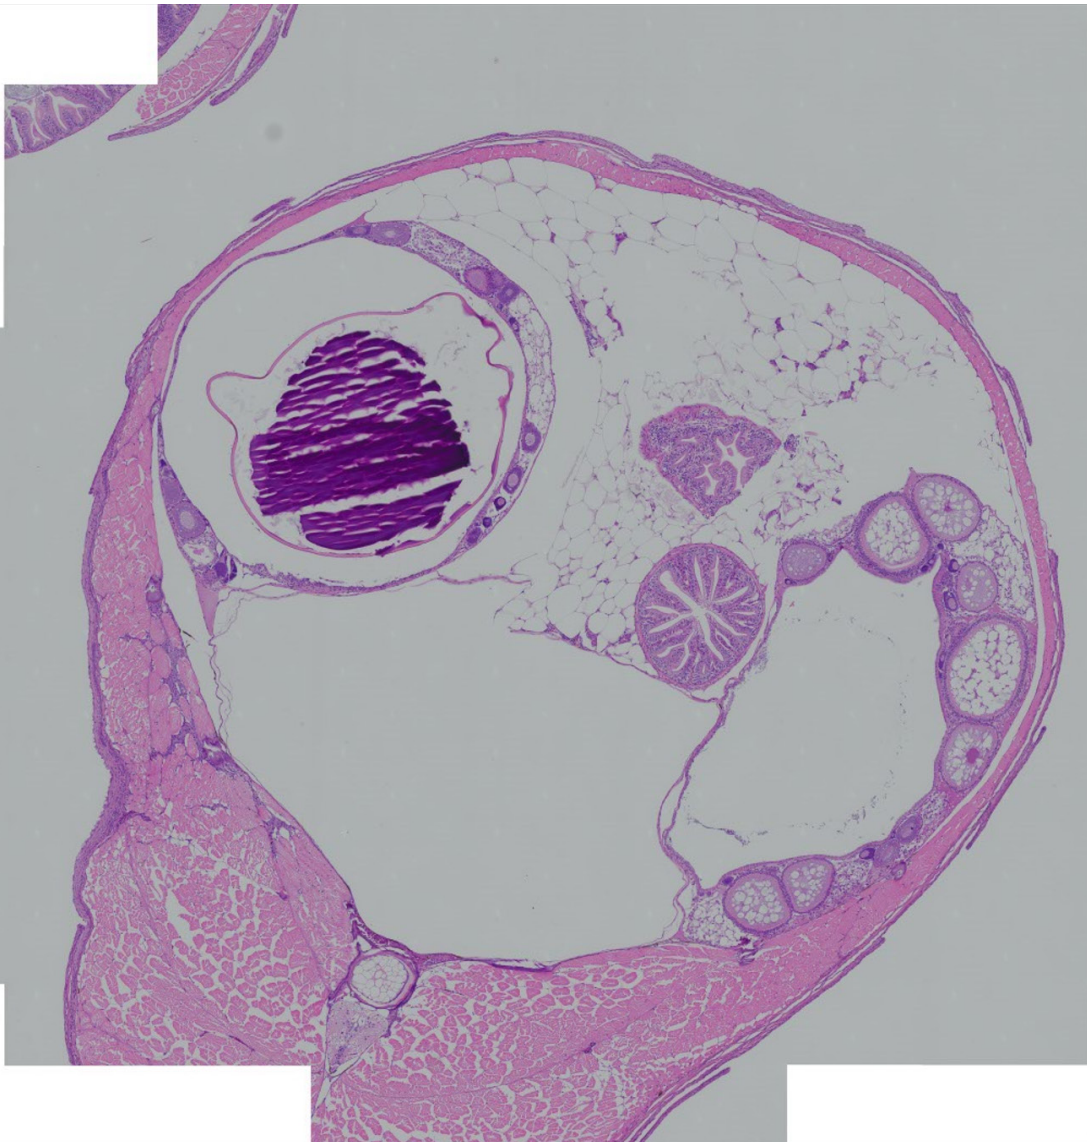

Supplement: fig2-data2 [file elife-85960-fig2-data2-v1.pdf]
