# Supplementary material for: A scalable and tunable platform for functional interrogation of peptide hormones in fish
Source: eLife journal article supplement (doi:10.7554/elife.85960), 2023-09-18

## Figure 2 - Source Data 3

### A. H&E images of the body cavity of *gh1<sup>Δ4/Δ4</sup>* and WT females

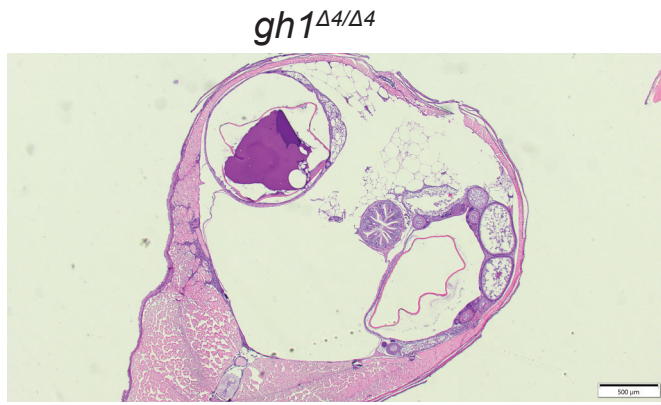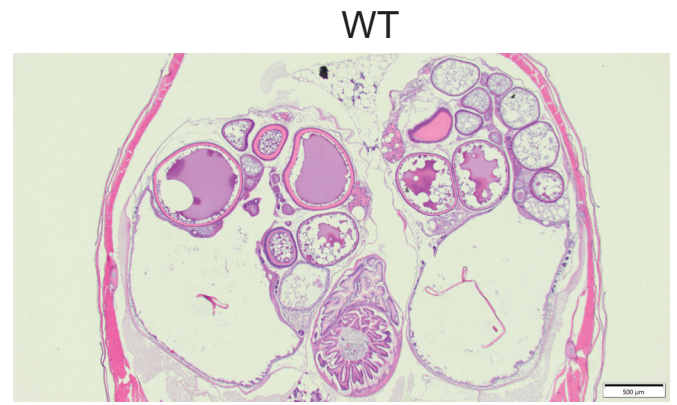

### B. Live images of eggs from *gh1<sup>Δ4/Δ4</sup>*, *gh1<sup>Δ4/+</sup>* and WT females

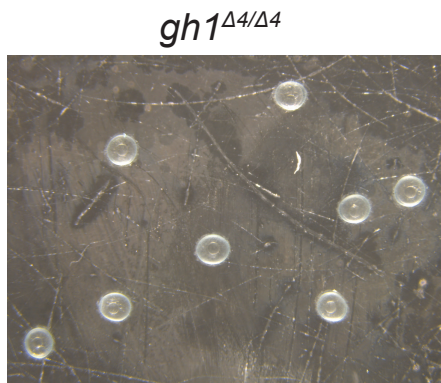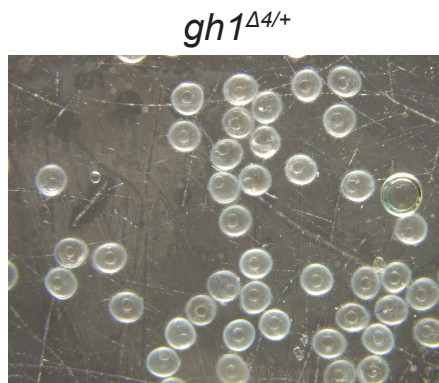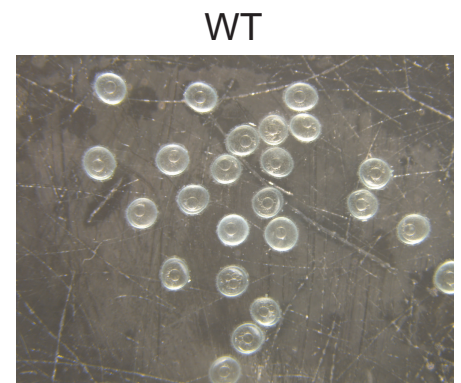

Supplement: fig2-figsupp1-data1 [file elife-85960-fig2-figsupp1-data1-v1.pdf]
