# Supplementary material for: A scalable and tunable platform for functional interrogation of peptide hormones in fish
Source: eLife journal article supplement (doi:10.7554/elife.85960), 2023-09-18

### Figure 3 - Source Data 1

**A.** Fish injected with a *CMV:GFP* plasmid

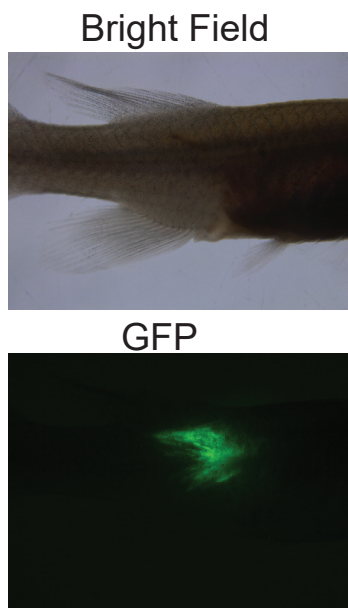

**B.** Fluorescent images of electroporated and non-electroporated injected fish

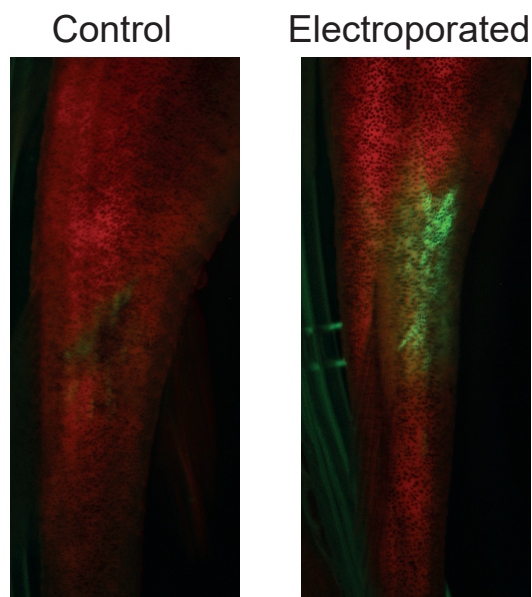

**C.** Fluorescent images of immunostaining for GH in muscle fibers of WT fish injected with a *CMV:gh1-T2A-GFP* plasmid with anti-GH antibody

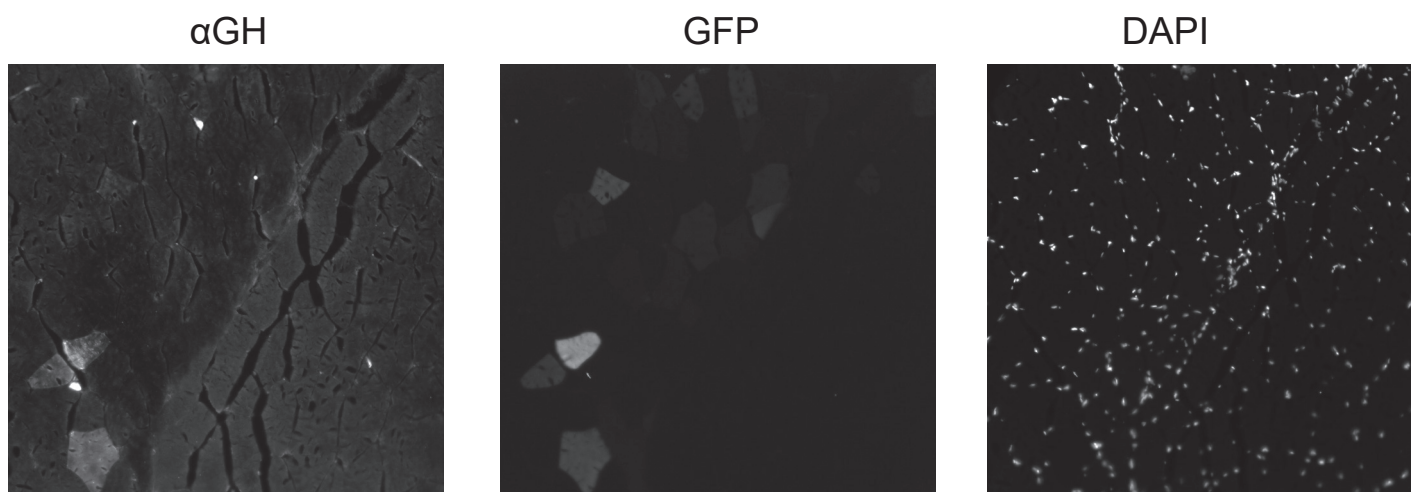

**D.** Fluorescent images of immunostaining for GH in muscle fibers of WT fish injected with a *CMV:gh1-T2A-GFP* plasmid with no primary antibody

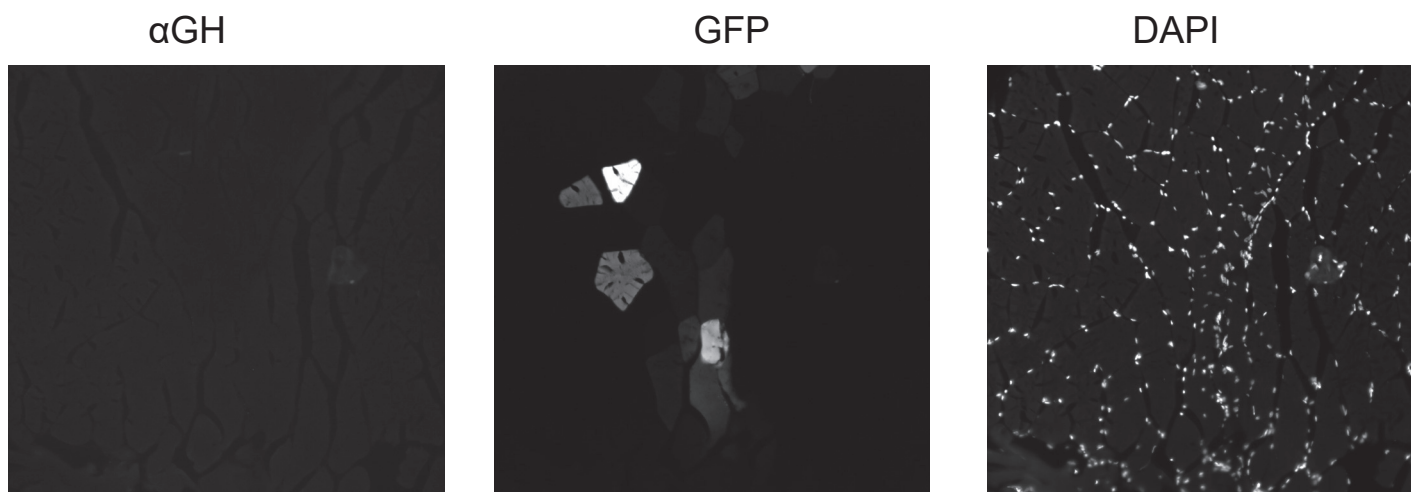

Supplement: fig3-data1 [file elife-85960-fig3-data1-v1.pdf]
