# Supplementary material for: A scalable and tunable platform for functional interrogation of peptide hormones in fish
Source: eLife journal article supplement (doi:10.7554/elife.85960), 2023-09-18

### Figure 3 - Source Data 2

#### A. Live images of male and female $gh1^{\Delta4/\Delta4}$ , rescued $gh1^{\Delta4/\Delta4}$ and WT fish

$gh1^{\Delta4/\Delta4}$

rescued  $gh1^{\Delta4/\Delta4}$

WT

♀

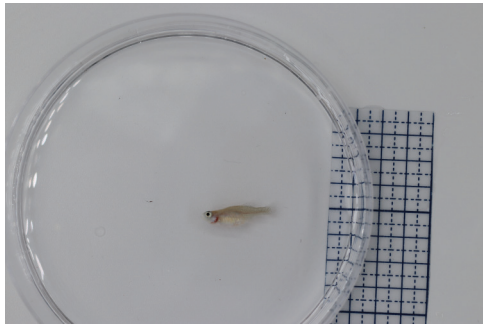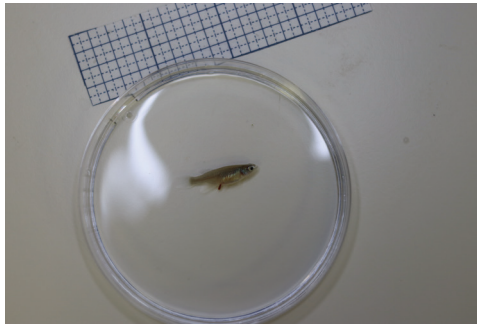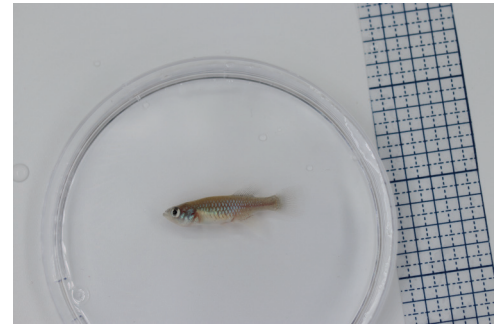

♂

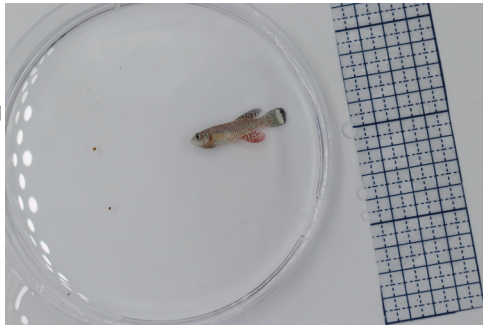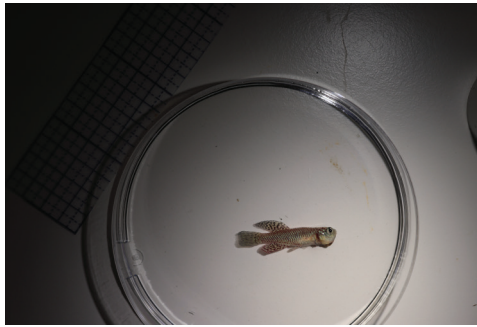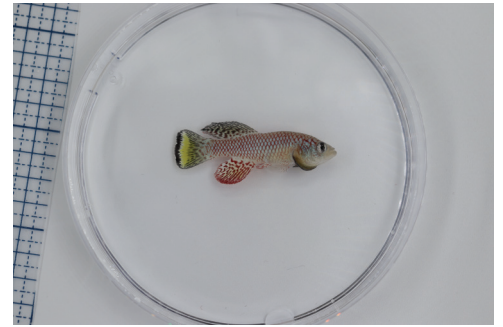

#### B. Live images of ovaries of $gh1^{\Delta4/\Delta4}$ , rescued $gh1^{\Delta4/\Delta4}$ and WT fish

$gh1^{\Delta4/\Delta4}$

rescued  $gh1^{\Delta4/\Delta4}$

WT

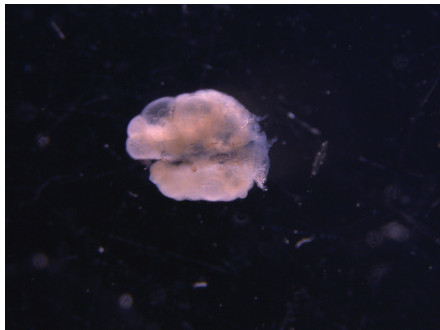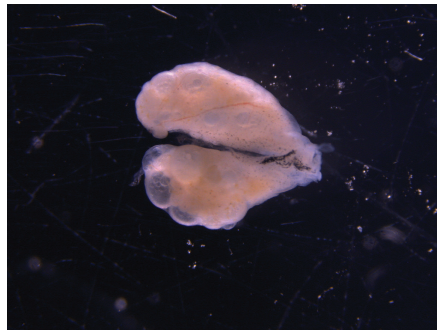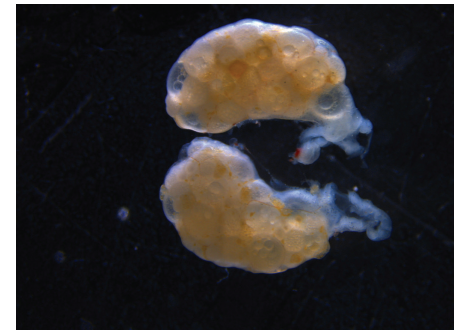

Supplement: fig3-data2 [file elife-85960-fig3-data2-v1.pdf]
