# Supplementary material for: A scalable and tunable platform for functional interrogation of peptide hormones in fish
Source: eLife journal article supplement (doi:10.7554/elife.85960), 2023-09-18

### Figure 3 - Source Data 3

A. Fluorescent images of immunostaining for GH in muscle fibers of *gh1<sup>Δ4/Δ4</sup>* fish injected with the indicated plasmids

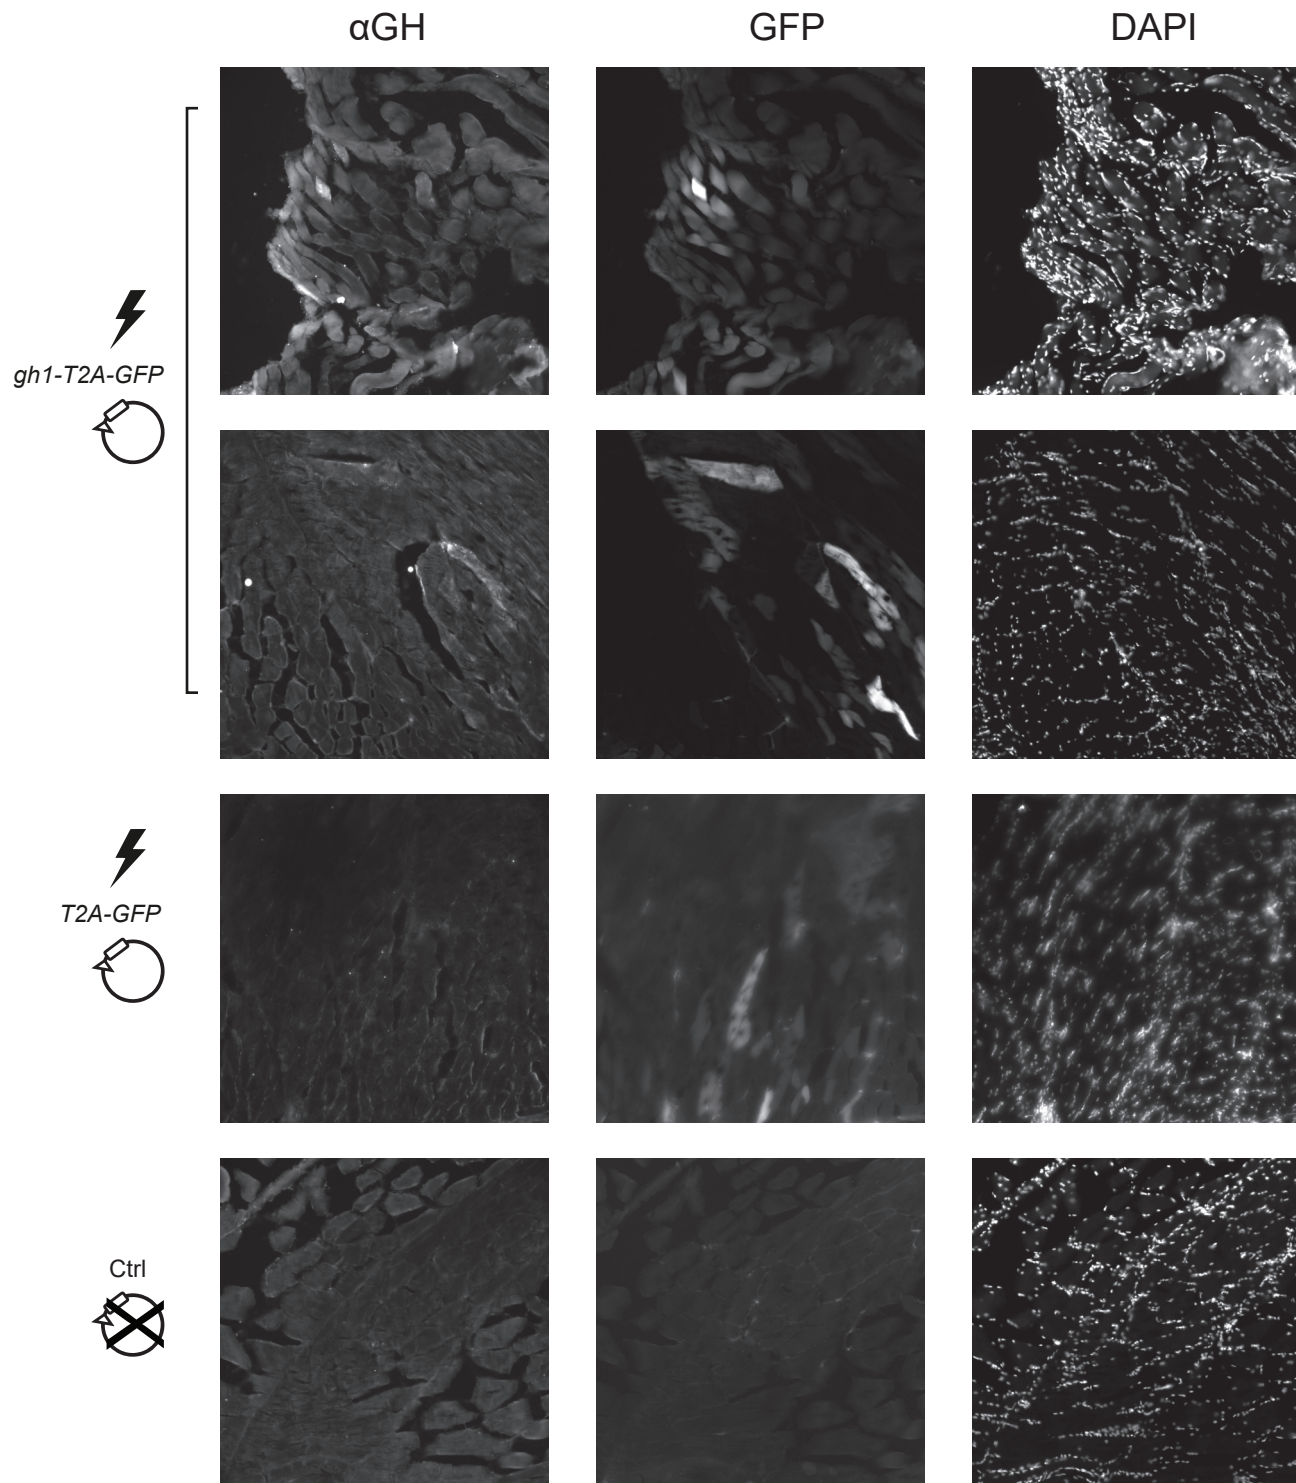

Supplement: fig3-figsupp1-data1 [file elife-85960-fig3-figsupp1-data1-v1.pdf]
