# Supplementary material for: A scalable and tunable platform for functional interrogation of peptide hormones in fish
Source: eLife journal article supplement (doi:10.7554/elife.85960), 2023-09-18

# Figure 4 - Source Data 1

**A.** Live images of WT and *tshb*<sup>Δ10/Δ10</sup> male fish

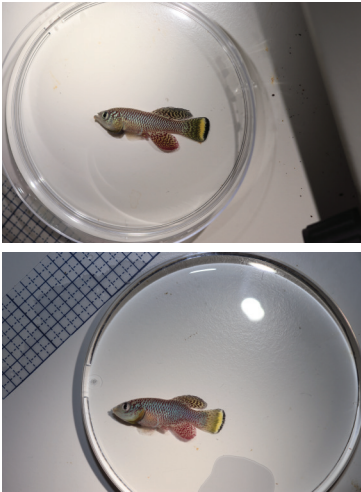

**B.** H&E images of WT and *tshb*<sup>Δ10/Δ10</sup> ovary

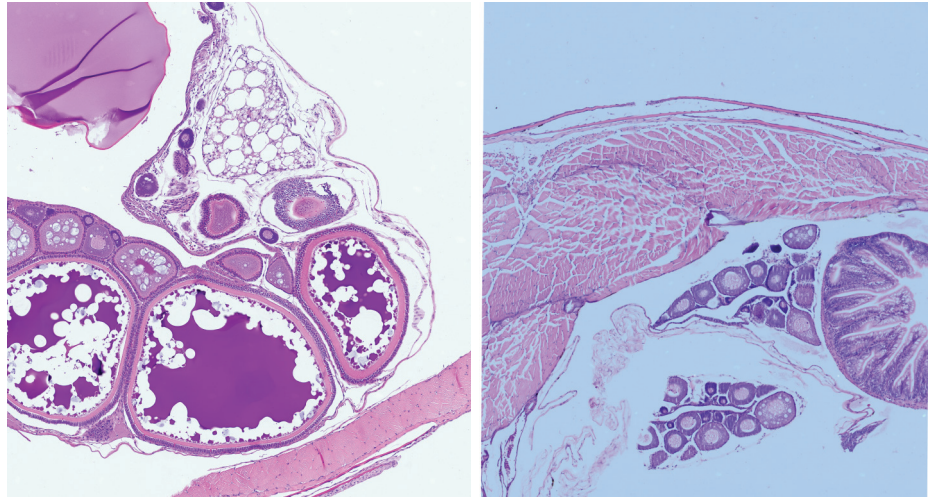

**C.** H&E images of WT and *fshb*<sup>in1/in1</sup> ovary

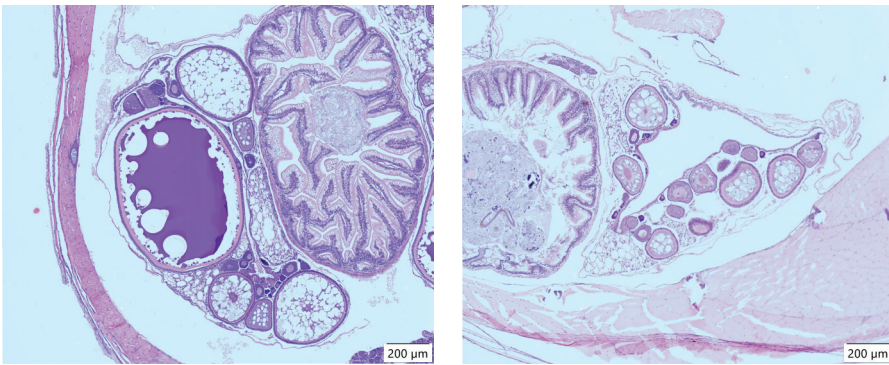

**D.** H&E image of rescued *fshb*<sup>in1/in1</sup> ovary

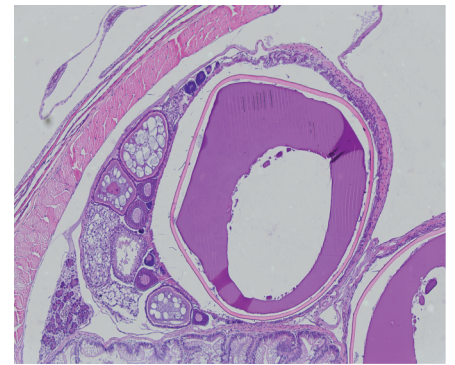

**E.** live and fluorescent images of ovaries of fish injected with an *fshb*-GFP fusion plasmid

Bright field

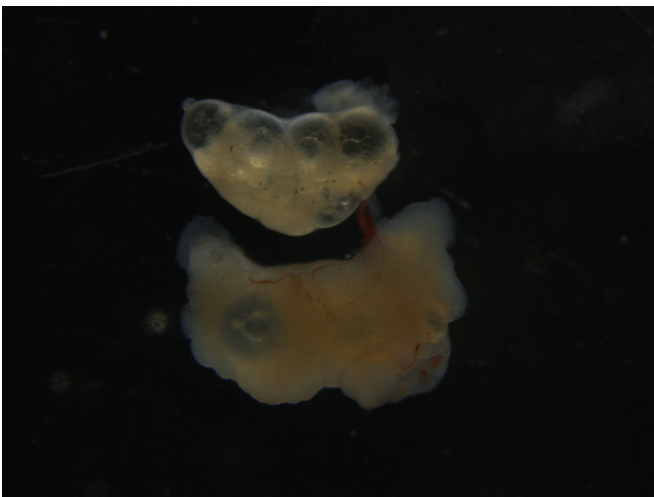

GFP

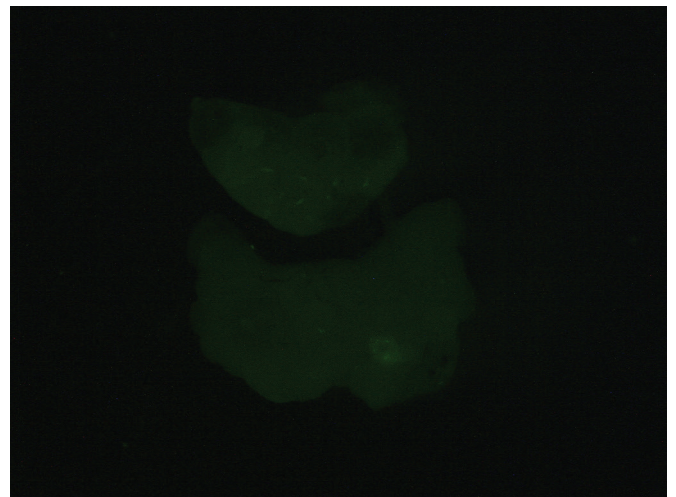

Supplement: fig4-data1 [file elife-85960-fig4-data1-v1.pdf]
