# Supplementary material for: A scalable and tunable platform for functional interrogation of peptide hormones in fish
Source: eLife journal article supplement (doi:10.7554/elife.85960), 2023-09-18

## Figure 5 - Source Data 1

**A.** Fluorescent images of fish injected with different amounts of a *CMV: gh1-T2A-GFP* plasmid

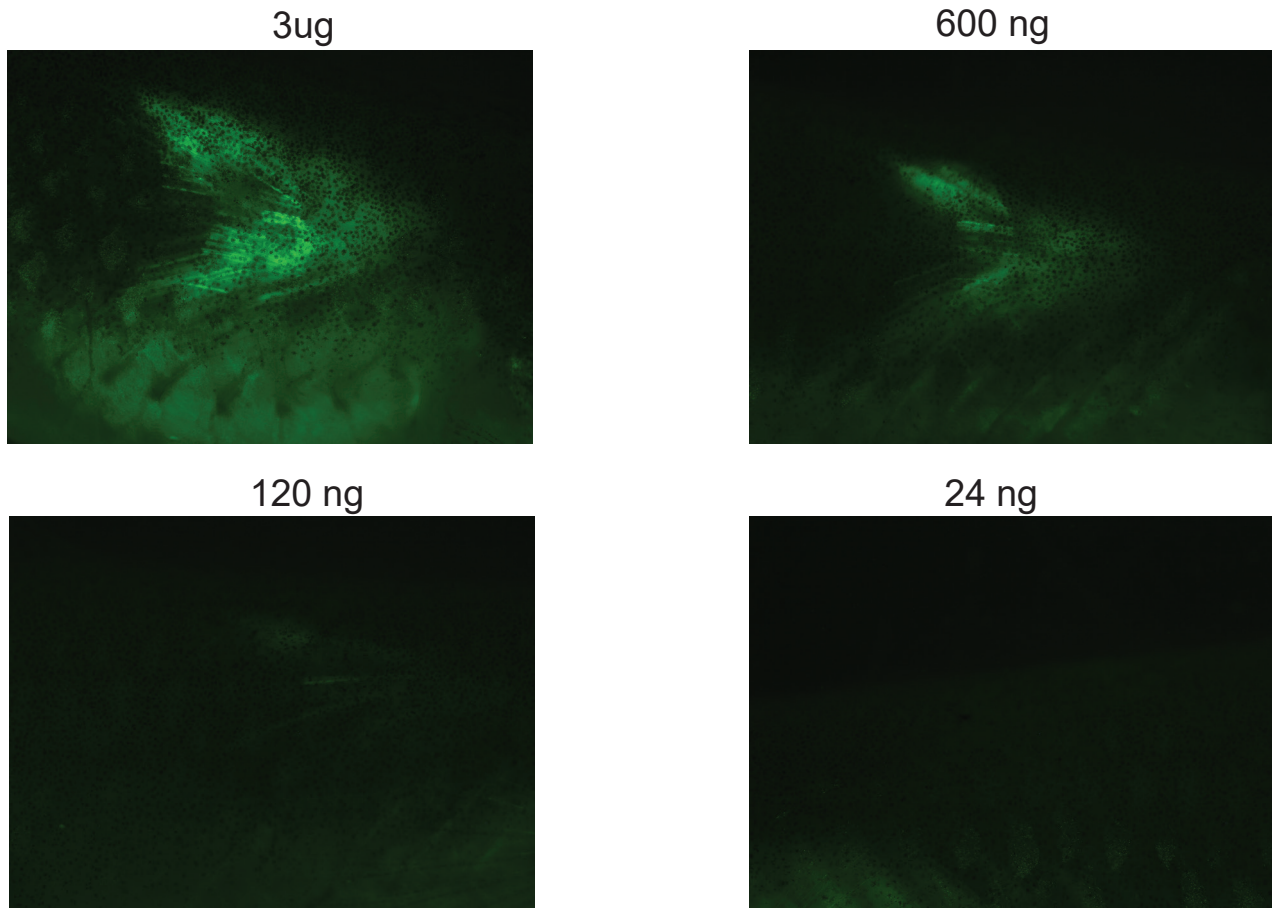

**B.** Fluorescent images of fish injected with *gh1-GFP* and *fshb-dTomato*

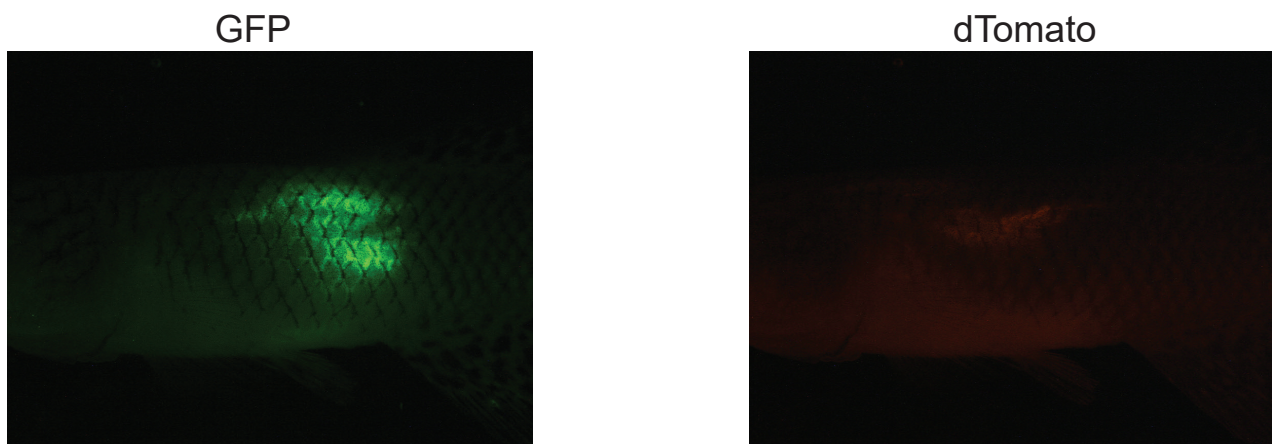

**C.** Fluorescent images of TetOn:*fshb-T2A-GFP* electroporated fish with and without Dox treatment

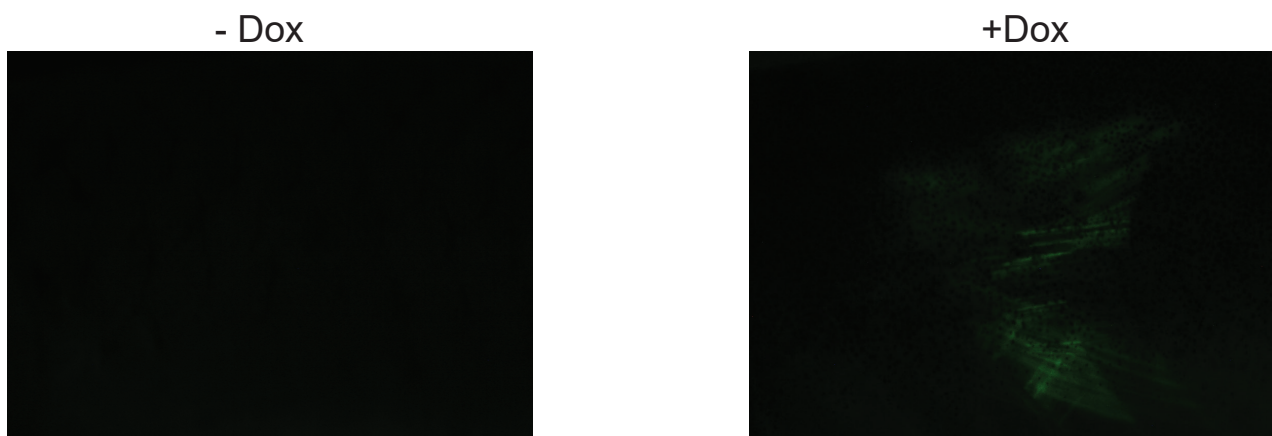

Supplement: fig5-data1 [file elife-85960-fig5-data1-v1.pdf]
