# Supplementary material for: A scalable and tunable platform for functional interrogation of peptide hormones in fish
Source: eLife. 2023 Oct 24;12:e85960. doi: 10.7554/eLife.85960 (PMC10597582; doi:10.7554/eLife.85960)
Supplement: Figure 1—figure supplement 1—source data 1. [file elife-85960-fig1-figsupp1-data1.xlsx]

## Sheet: Figure 1- supplement 1A
Sex	Male			Female
Genotype	WT	ghΔ4/+	ghΔ4/Δ4	WT	ghΔ4/+	ghΔ4/Δ4
	60	72	20	50	66	15
Distribiution of offspring from crossing of ghΔ4/+ pairs

## Sheet: Figure 1- supplement 1B
Sex	Male		Female
Genotype	WT	ghΔ4/+	WT	ghΔ4/+
	29	38	25	27.5
	30	35	25	27
	27	27	24	27
	22	27	30	29
	25	29	26	25
	31	26	22	25
	31.5	28	22	26
	34	26	22	23
		25	27	24
		23	27
		26	30
			30
Standard length of fish from the indicated sex and genotype
