# Supplementary material for: A scalable and tunable platform for functional interrogation of peptide hormones in fish
Source: eLife. 2023 Oct 24;12:e85960. doi: 10.7554/eLife.85960 (PMC10597582; doi:10.7554/eLife.85960)
Supplement: Figure 2—source data 3. [file elife-85960-fig2-data3.xlsx]

## Sheet: 2A- gh mutant size
Sex	Male		Female
Genotpye	WT	ghΔ4/Δ4	WT	ghΔ4/Δ4
	25	17	22	11
	30	15	25	12
	24	14	20	16
	27	12	21	14
	23	16	24	13
	28	15	22	12
	25		25	10
	24		20
	24		21
Standard length of fish from the indicated sex and genotype

## Sheet: 2B - gh mutant fertility- time
Genotype/Age (weeks)	WT							ghΔ4/Δ4
7	66	0	10	67	9	47	35	0	0	0
8	60	2	48	87	37	22	41	0	0	0
9	95	3	28	61	31	29	51	0	5	5
10	90	28	54	89	42	35	66	0	1	5
11	75	0	12	11	0	8	36	8	0	6
12	66	0	49	5	57	7	16	2	7	8
13	12	0	0	0	0	32	0	6	20	0
14	0	0	0	0	0	0	0	19	3	18
15	0	0	0	0	0	0	0	14	5	13
16	0	0	0	0	0	0	0	15	4	0
Number of eggs laid per week by couples from the indicated genotypes

## Sheet: 2C - week of maximal fertility
Genotype	WT	ghΔ4/Δ4
	9	13
	10	13
	10	14
	10
	12
	7
	10
Age (in weeks) at which a couple of the indicated genoype reached peak fertility

## Sheet: 2C-eggs at maximal fertility
Genotype	WT	ghΔ4/Δ4
	95	19
	28	20
	54	18
	89
	57
	47
	66
Maximal number laid by a couple of the indicated genotype in one week

## Sheet: 2E - proportion of egg stages
Genotype/ Developmental stage	WT	ghΔ4/Δ4
PG	66	40
PV	49	24
V	36	20
M	13	8
Total number of eggs in each developmental stage

## Sheet: 2F - proportion of sperm stages
Genotype/ Developmental stage	WT	ghΔ4/Δ4
SG	23	14
SC	29	15
ST	23	14
SZ	19	10
Total number of cysts in each developmental stage

## Sheet: Figure 2- supplement 1B
Genotype	WT	ghΔ4/+	ghΔ4/Δ4
	0.866	0.881	0.965
	0.892	0.903	0.913
	1.042	0.917	0.938
	0.952	0.969	0.905
	0.842	0.926	0.878
	0.917	0.998	0.88
	0.85	0.898	0.895
	0.974	0.895	0.862
	0.891	0.898
	0.978	1.022
	0.948	0.986
	0.917	0.922
	0.978	0.89
	0.873	0.967
	0.883	0.861
	0.973	0.97
	0.948	0.928
	0.849	1.04
	0.776	1.01
	0.875	0.948
	0.889	0.84
	0.825	0.943
	0.887	0.922
		0.888
		0.955
		0.888
		0.985
		0.979
		1.015
		0.778
		0.968
		0.938
		0.788
		0.883
		1.001
		0.91
		0.805
		0.931
		0.916
		0.97
Diameter in mm of eggs laid by couples of the indicated genotype
