# Supplementary material for: A scalable and tunable platform for functional interrogation of peptide hormones in fish
Source: eLife. 2023 Oct 24;12:e85960. doi: 10.7554/eLife.85960 (PMC10597582; doi:10.7554/eLife.85960)
Supplement: Figure 3—source data 3. [file elife-85960-fig3-data3.xlsx]

## Sheet: 3D - size of GH rescued fish
Sex	Male			Female
Genotype	WT	Rescued ghΔ4/Δ4	Empty vector ghΔ4/Δ4	WT	Rescued ghΔ4/Δ4	Empty vector ghΔ4/Δ4
	29	24	17	25	16	17
	30	22	21	25	16	14
	27	24	21	24	15	16
	22	20	20	30	18	16
	25	21	20	26	23
	31	21		22	21
	31.5	22		22	19
	34	23		22
		22		27
				27
				30
				30
Standard length of fish from the indicated sex and genotype

## Sheet: 3E - rescue of GH fertility 
Genotype	WT	ghΔ4/Δ4	Rescued ghΔ4/Δ4
	28	0	4
	54	0	22
	12	8	44
	49	2	60
	51	5	6
	66	1	28
	36	0	38
	16	7	52
	31	5
	42	5
	0	6
	57	8
Number of eggs laid per week by couples from the indicated genotypes

## Sheet: Figure 3- supplement 1B
Genotype	WT	ghΔ4/Δ4	Rescued ghΔ4/Δ4
	4.03642	3.88146	4.76527
	4.17168	4.48734	4.32933
	4.74	5.88917	4.3194
	4.62895	4.0604
	4.25492	4.57703
	4.2984	4.25986
	4.24944	4.29984
	4.39227	4.04323
	3.96195	4.53485
	4.55064	4.95808
	4.76297	3.55869
	4.80114	3.82711
		4.05535
Length/ hieght ratio of fish from the indicated genotypes
